# Supplementary material for: Predicting Quantitative Genetic Interactions by Means of Sequential Matrix Approximation
Source: PubMed Central journal article supplement (PMC2538561; doi:10.1371/journal.pone.0003284), 2008-09-26

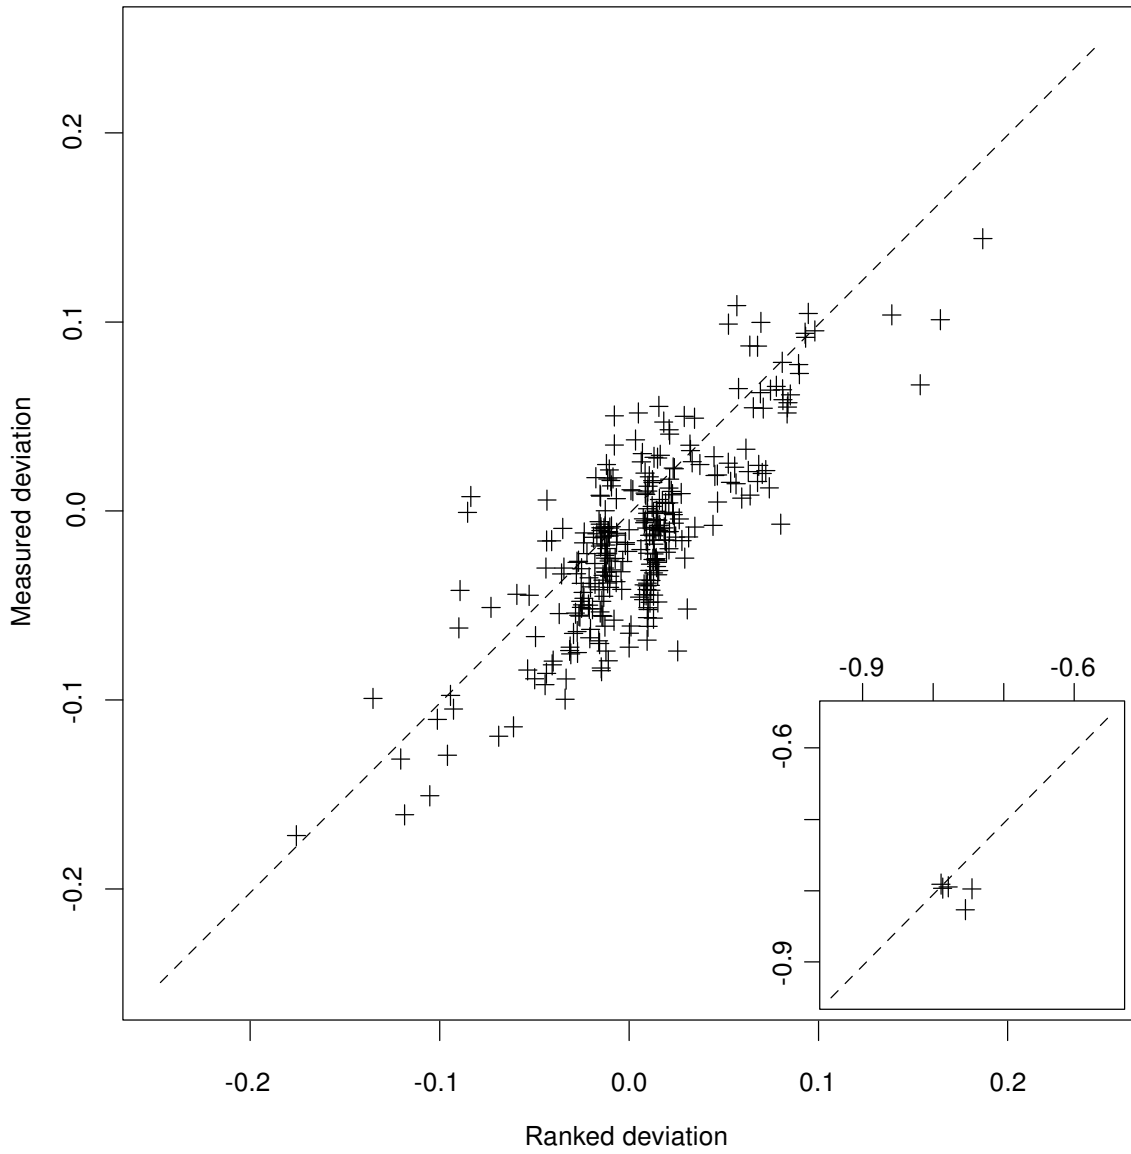

Supplement: pone.0003284.s002.pdf [file pone.0003284.s002.pdf]
